# Supplementary material
Source: publisher figshare collection journal article supplement (https://f1000.figshare.com/ndownloader/files/1170424)
Supplement: Supplementary file 1 [file 1170424]

Mouse ID	Experiment	Treatment	BL L	BL R	BL Average	0.5 L	0.5 R	0.5 Average	0.5 delta	1.5 L	1.5 R	1.5 Average	1.5 delta	2.5 L	2.5 R	2.5 Average	2.5 delta
DC1-I8	1	Sal/Sal	3.1	3	3.05	3.2	3.2	3.2	0.15	3.2	3.2	3.2	0.15	3.1	3	3.05	0
DC1-I9	1	Sal/Sal	2.8	2.7	2.75	2.9	2.9	2.9	0.15	3	3	3	0.25	2.7	2.8	2.75	0
DC1-B10	1	Sal/Sal	2.9	2.8	2.85	2.9	2.9	2.9	0.05	3	3	3	0.15	2.8	2.9	2.85	0
DC1-F9	1	Sal/Sal	2.9	2.8	2.85	2.9	2.8	2.85	0	2.9	2.8	2.85	0	3	3	3	0.15
DC2-F4	1	Sal/c48/80	3	2.9	2.95	3.6	3.4	3.5	0.55	3.1	3.2	3.15	0.2	3	3	3	0.05
DC2-F6	1	Sal/c48/80	3	3	3	3.6	3.6	3.6	0.6	3.2	3.3	3.25	0.25	3.1	3.2	3.15	0.15
DC2-O4	1	Sal/c48/80	3	3	3	3.8	3.7	3.75	0.75	3.5	3.4	3.45	0.45	3.3	3.2	3.25	0.25
DC2-K10	1	Sal/c48/80	3	2.8	2.9	3.7	3.8	3.75	0.85	3.4	3.4	3.4	0.5	3.3	3.1	3.2	0.3
DC2-Z2	1	Sal/c48/80	2.9	2.9	2.9	3.8	3.7	3.75	0.85	3.3	3.4	3.35	0.45	3.2	3.2	3.2	0.3
DC2-I4	1	Sal/c48/80	3.1	2.9	3	3.6	3.5	3.55	0.55	3.4	3.3	3.35	0.35	3.2	3.2	3.2	0.2
DC2-I2	1	Sal/c48/80	2.7	2.7	2.7	3.7	3.6	3.65	0.95	3.2	3.1	3.15	0.45	3	3.1	3.05	0.35
DC2-J2	1	Sal/c48/80	2.9	2.9	2.9	3.6	3.6	3.6	0.7	3.3	3.2	3.25	0.35	3.1	3.2	3.15	0.25
DC2-J4	1	Sal/c48/80	2.9	2.7	2.8	3.7	3.5	3.6	0.8	3.5	3.4	3.45	0.65	3.3	3	3.15	0.35
DC2-J6	1	Sal/c48/80	2.8	2.7	2.75	3.5	3.5	3.5	0.75	3.3	3.2	3.25	0.5	3.2	3.1	3.15	0.4
DC2-J7	1	Sal/c48/80	2.6	2.7	2.65	3.5	3.4	3.45	0.8	2.9	3	2.95	0.3	3.1	3	3.05	0.4
DC3-K2	1	aTNFa/c48/80	2.8	2.8	2.8	3.6	3.5	3.55	0.75	3.2	3.1	3.15	0.35	3	3	3	0.2
DC3-K4	1	aTNFa/c48/80	2.7	2.8	2.75	3.1	3.1	3.1	0.35	3	3	3	0.25	2.9	3	2.95	0.2
DC3-K6	1	aTNFa/c48/80	2.9	2.8	2.85	3.5	3.3	3.4	0.55	3.2	3.3	3.25	0.4	3.1	3	3.05	0.2
DC3-K7	1	aTNFa/c48/80	2.8	2.9	2.85	3.4	3.4	3.4	0.55	3.2	3.3	3.25	0.4	3.3	3.3	3.3	0.45
DC3-K9	1	aTNFa/c48/80	3	3	3	3.4	3.5	3.45	0.45	3.2	3.3	3.25	0.25	3.2	3.1	3.15	0.15
DC3-O5	1	aTNFa/c48/80	2.8	2.9	2.85	3.5	3.6	3.55	0.7	3.4	3.5	3.45	0.6	3.2	3.1	3.15	0.3
DC3-O2	1	aTNFa/c48/80	2.8	2.7	2.75	3.4	3.6	3.5	0.75	3.1	3.2	3.15	0.4	3.2	3.2	3.2	0.45
DC3-O1	1	aTNFa/c48/80	2.8	2.7	2.75	3.7	3.6	3.65	0.9	3.2	3.1	3.15	0.4	3	3	3	0.25
DC3-F9	1	aTNFa/c48/80	2.8	2.9	2.85	3.1	3.2	3.15	0.3	3.1	3	3.05	0.2	3.1	3	3.05	0.2
DC3-F7	1	aTNFa/c48/80	3.2	3.1	3.15	3.8	3.3	3.55	0.4	3.4	3.1	3.25	0.1	3.1	3.2	3.15	0
DC3-F1	1	aTNFa/c48/80	3	2.9	2.95	3.6	3.5	3.55	0.6	3.5	3.2	3.35	0.4	3.2	3.3	3.25	0.3
DC3-F3	1	aTNFa/c48/80	2.7	2.7	2.7	3.6	3.5	3.55	0.85	3.2	3.1	3.15	0.45	3.2	3	3.1	0.4
DC3-F5	1	aTNFa/c48/80	2.8	2.9	2.85	3.7	3.7	3.7	0.85	3.2	3.3	3.25	0.4	3.2	3.2	3.2	0.35
DC4-O1	2	Sal/Sal	2.5	2.5	2.50	2.5	2.6	2.55	0.05	2.5	2.6	2.55	0.05	2.6	2.5	2.55	0.05
DC4-O5	2	Sal/Sal	2.6	2.5	2.55	2.5	2.5	2.5	-0.05	2.5	2.5	2.5	-0.05	2.6	2.5	2.55	0.00
DC4-W1	2	Sal/Sal	2.6	2.5	2.55	2.6	2.8	2.7	0.15	2.6	2.8	2.7	0.15	2.4	2.6	2.5	-0.05
DC4-W2	2	Sal/Sal	2.5	2.6	2.55	2.5	2.5	2.5	-0.05	2.5	2.5	2.5	-0.05	2.5	2.5	2.5	-0.05
DC4-W3	2	Sal/Sal	2.6	2.4	2.50	2.6	2.6	2.6	0.10	2.6	2.6	2.6	0.10	2.7	2.5	2.6	0.10
DC4-W5	2	Sal/Sal	2.4	2.6	2.50	2.4	2.4	2.4	-0.10	2.4	2.4	2.4	-0.10	2.5	2.4	2.45	-0.05
DC4-W9	2	Sal/Sal	2.6	2.6	2.60	2.5	2.6	2.55	-0.05	2.5	2.6	2.55	-0.05	2.4	2.6	2.5	-0.10
DC4-A7	2	Sal/Sal	2.4	2.5	2.45	2.5	2.6	2.55	0.10	2.5	2.6	2.55	0.10	2.3	2.5	2.4	-0.05
DC5-P2	2	Sal/c48/80	2.5	2.5	2.5	3.6	3.3	3.45	0.95	3	3.1	3.05	0.55	2.9	2.9	2.9	0.4
DC5-D5	2	Sal/c48/80	2.5	2.6	2.55	3.2	3.1	3.15	0.6	2.8	3	2.9	0.35	2.6	2.8	2.7	0.15
DC5-D6	2	Sal/c48/80	2.3	2.4	2.35	3.4	3.3	3.35	1	3	3.1	3.05	0.7	2.8	2.8	2.8	0.45
DC5-D10	2	Sal/c48/80	2.4	2.6	2.5	3.4	3.3	3.35	0.85	2.8	2.9	2.85	0.35	2.5	2.7	2.6	0.1
DC5-E3	2	Sal/c48/80	2.4	2.4	2.4	3.1	3.2	3.15	0.75	2.9	3	2.95	0.55	2.7	2.5	2.6	0.2
DC5-E6	2	Sal/c48/80	2.4	2.3	2.35	3.6	3.4	3.5	1.15	3	3.1	3.05	0.7	2.5	2.8	2.65	0.3
DC5-V8	2	Sal/c48/80	2.4	2.5	2.45	3.4	3.2	3.3	0.85	3.2	3	3.1	0.65	3	2.9	2.95	0.5
DC6-V7	2	aTNFa/c48/80	2.5	2.5	2.50	3	3	3	0.50	2.9	2.9	2.9	0.40	2.7	2.7	2.7	0.20
DC6-P5	2	aTNFa/c48/80	2.3	2.4	2.35	3	2.9	2.95	0.60	3.1	2.9	3	0.65	2.9	2.7	2.8	0.45
DC6-D8	2	aTNFa/c48/80	2.5	2.5	2.50	3.1	3.1	3.1	0.60	2.7	2.8	2.75	0.25	2.7	2.9	2.8	0.30
DC6-C5	2	aTNFa/c48/80	2.3	2.4	2.35	2.8	2.9	2.85	0.50	2.7	2.7	2.7	0.35	2.7	2.8	2.75	0.40
DC6-A6	2	aTNFa/c48/80	2.5	2.4	2.45	3	3.3	3.15	0.70	3	3	3	0.55	2.7	2.9	2.8	0.35
DC6-V10	2	aTNFa/c48/80	2.5	2.4	2.45	3.1	3	3.05	0.60	2.7	2.9	2.8	0.35	2.6	2.8	2.7	0.25
